# Supplementary material for: CaO2–Cu2O micromotors accelerate infected wound healing through antibacterial functions, hemostasis, improved cell migration, and inflammatory regulation
Source: Royal Society of Chemistry journal article supplement (doi:10.1039/d3tb02335d), 2023-12-01
Supplement: d3tb02335d1.pdf [file d3tb02335d1.pdf]

## *Supporting information*

### **1. Experimental details**

#### *1.1. Preparation of RSF*

The degummed silk fibroin was prepared by immersing the silkworm cocoons in 0.5% Na<sub>2</sub>CO<sub>3</sub> solution and boiled for 30 min for three times. Then, the obtained regenerated silk fibroin (RSF) was rinsed thoroughly with deionized water to remove the residual sericin. After drying (60 °C, 6 h), the degummed RSF was dissolved in a ternary solution of CaCl<sub>2</sub>: CH<sub>3</sub>CH<sub>2</sub>OH: H<sub>2</sub>O (v/v/v = 1:2:8) at 60 °C for 3 h, and then, the insoluble impurities were removed by centrifugation (7000 g, 10 min). Subsequently, a clear desalted RSF solution was obtained after dialysis for three days.

RSF solution (10 mL, 4%) was dropped into the plate and dried in a vacuum drying oven (42 °C, 100 mb). The RSF film was obtained and taken out after completely drying. Subsequently, the RSF film was annealed (60 °C, 500 mb) for 4 h. Finally, the RSF film was observed whether it dissolved in water.

#### *1.2. Cell adhesion assay*

The RSF film was cut into the same size as the 12-well plate and put into the 12-well plate for UV irradiation for 2 h. The perforated plate without any treatment was used as the control group, while 3M Transparent Dressing and RSF film were used as the experimental group, with 3 parallel groups in each group. Each well was inoculated with  $1.0 \times 10^5$  cells/well and incubated overnight. After that, the cells were washed with PBS containing calcium and magnesium for 3 times, and fixed with paraformaldehyde for 30 min. After being fixed, the cells were soaked with 1% Triton for 10 minutes, then

washed with PBS for 2 times, and soaked with 1% BSA for 30 minutes, then washed with PBS for 2 times. Finally, 500  $\mu\text{L}$  Actin-Tracker Red-555 dye was added and stained for 1 h, and then 500  $\mu\text{L}$  DAPI was added and strained for 10 minutes. Finally, anti-fluorescent agent was added for confocal photography.

### *1.3. Biocompatibility assay of RSF films*

The biocompatibility of RSF films was evaluated by using the leach liquor. Firstly, the RSF film was immersed in DMEM medium containing antibiotics for 12 h and the supernatant was collected. Then, L929 fibroblasts were seeded into a 96-well plate at a density of  $1.0 \times 10^4$  cells/well. After incubated in a 5%  $\text{CO}_2$  incubator at 37  $^\circ\text{C}$  for 24 h, the original culture medium was discarded. RSF films leach liquor was added to DMEM medium (containing 10% fetal bovine serum and 1% antibiotics) with a concentration of 100  $\mu\text{L}$  per well. After 24 h, 50  $\mu\text{L}$  MTT solution (0.5 mg /mL) was added, and then 50  $\mu\text{L}$  DMSO solution was added for incubation of 4 h. Finally, the OD value of cell suspension was measured at a wavelength of 570 nm.

### *1.4. Physicochemical characterization of $\text{CaO}_2\text{-Cu}_2\text{O}$ micromotors*

The dynamic light scattering instrument (DLS, Brooke, Billerica, USA) was used to measure the mean fluid volume dynamic diameter and the possessed polydispersity index (PDI) of various micro-particles. The crystalline state of micromotors was analyzed by X-Ray Diffractometer (XRD, Brooke, Billerica, USA). Scanning electron microscope (SEM, Hitachi, Tokyo, Japan) was used to observe the morphologies of various particles. X-ray photoelectron spectroscopy (XPS, Thermo

Fisher, Massachusetts, USA) was applied to investigate the composition of CaO<sub>2</sub>-Cu<sub>2</sub>O micromotors.

#### *1.5. Cytocompatibility of CaO<sub>2</sub>-Cu<sub>2</sub>O micromotors*

The MTT assay was used to determine the biocompatibility of particles. Initially, L929 fibroblasts, RAW 264.7 macrophages, and HUVECs were seeded into 96-well plates with a density of  $1.0 \times 10^4$  cells/well, and incubated overnight with complete medium. Then, cells were washed three times with PBS, and medium with various particles (200  $\mu$ L, 100  $\mu$ g/mL) was respectively added to each well for incubation of 24 h. Subsequently, the cells were incubated with MTT solution (100  $\mu$ L, 0.5 mg/mL) for 4 h at 37 °C, and DMSO (50  $\mu$ L) was added to each well to test the OD value at a wavelength of 570 nm. Cells without treatment were utilized as the negative control, and Triton X-100 (1%, w/v)-treated cells were used as the positive control.

#### *1.6. Permeation capacity of CaO<sub>2</sub>-Cu<sub>2</sub>O micromotors*

Hydroxyethyl cellulose (HEC) hydrogel (100  $\mu$ L, 5 w/v %) was transferred to 96-well plate to simulate the wound tissue with strong resistance for permeation. CaO<sub>2</sub>-Cu<sub>2</sub>O micromotors conjugated with coumarin (2.5 w/v%, 50  $\mu$ L) were added on the top of HEC hydrogel. Five minutes later, the HEC hydrogels were layer by layer scanned (10  $\mu$ m/layer) by super-resolution laser scanning confocal microscopy (SRLSCM, Olympus Corporation, Tokyo, Japan) to create the 3D view. The polystyrene (PS) microspheres conjugated with rhodamine were set as the control group (2.5 w/v%, 50  $\mu$ L).

#### *1.7. In vitro cell migration*

L929 fibroblasts and HUVECs were inoculated in 6-well plates with a density of  $1.0 \times 10^6$  cells/well, respectively. After overnight incubation, scratches were produced by scraping the monolayer of cells with a pipet tip. Subsequently, cells were washed and incubated with various particle suspensions. The regrowth of the 'wounded' areas was measured as a function of time from 0 to 48 h. Finally, the scratch area was quantified by Image J Software.

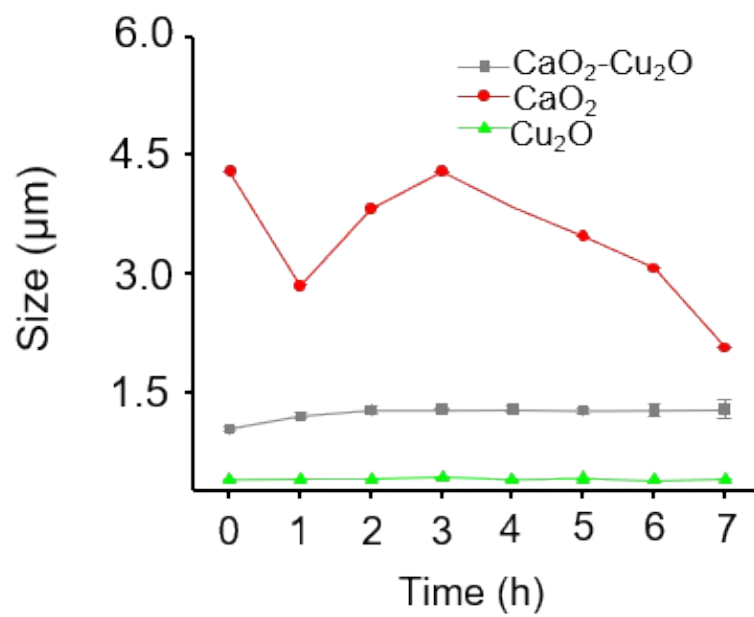

**Fig. S1.** Size variation of CaO<sub>2</sub>, Cu<sub>2</sub>O and CaO<sub>2</sub>-Cu<sub>2</sub>O micromotors at different time points.

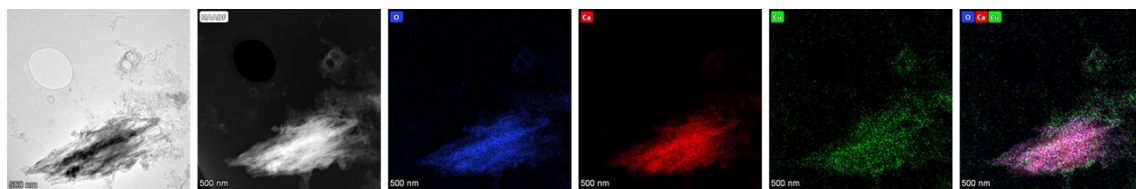

**Fig. S2.** EDS mapping image and elemental mapping for  $\text{CaO}_2\text{-Cu}_2\text{O}$  micromotors.

Scale bar = 500 nm.

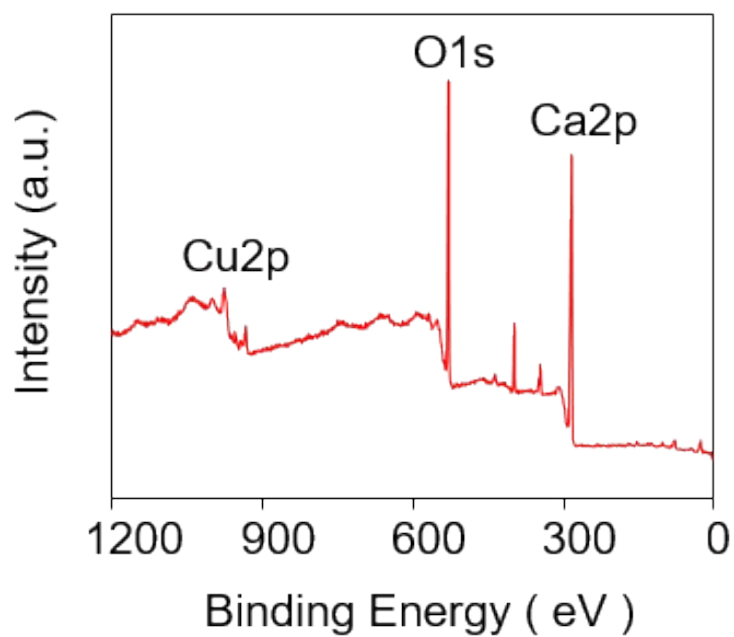

**Fig. S3.** X-ray photoelectron spectroscopy (XPS) survey spectrum of  $\text{CaO}_2\text{-Cu}_2\text{O}$  micromotors.

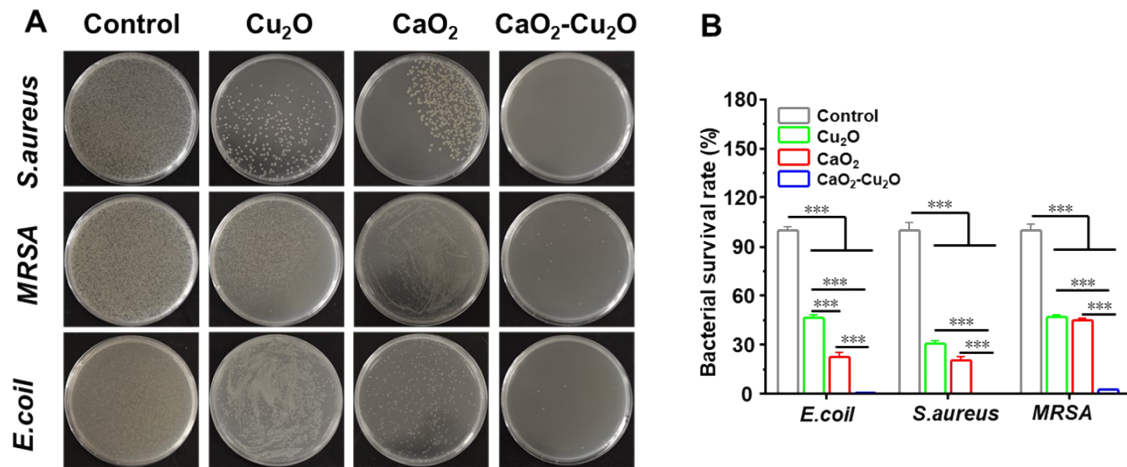

**Fig. S4.** Bactericidal efficiencies of CaO<sub>2</sub>, Cu<sub>2</sub>O and CaO<sub>2</sub>-Cu<sub>2</sub>O.



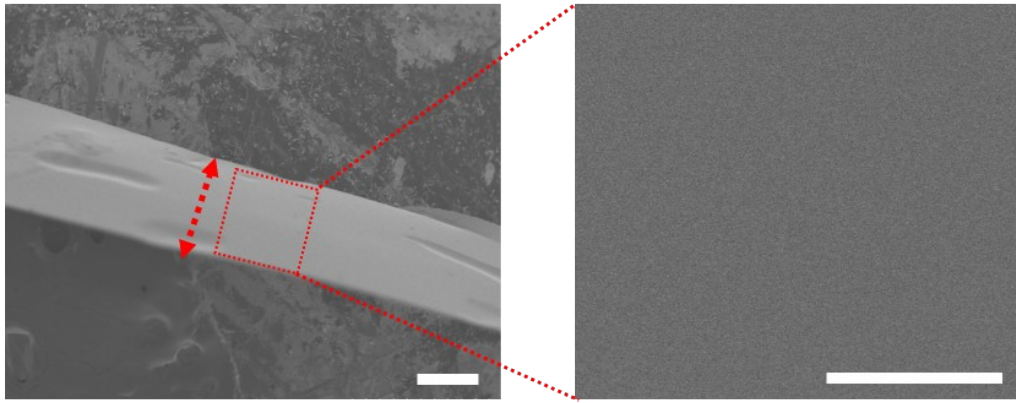

**Fig. S5.** SEM image of section of **the** RSF film. Scale bars=200  $\mu\text{m}$ .

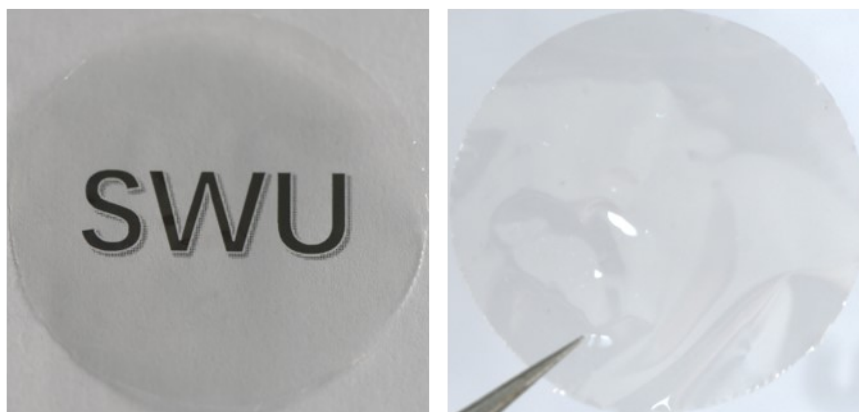

**Fig. S6.** Transparency of the RSF film.

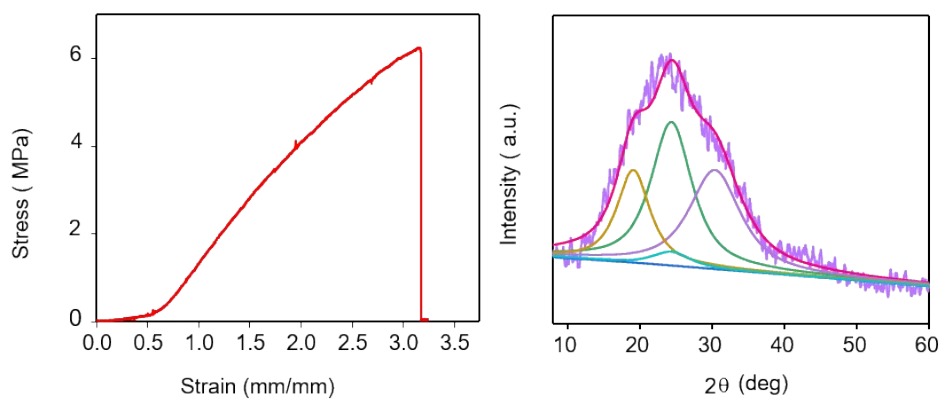

**Fig. S7.** Mechanical properties and XRD patterns of the RSF film.

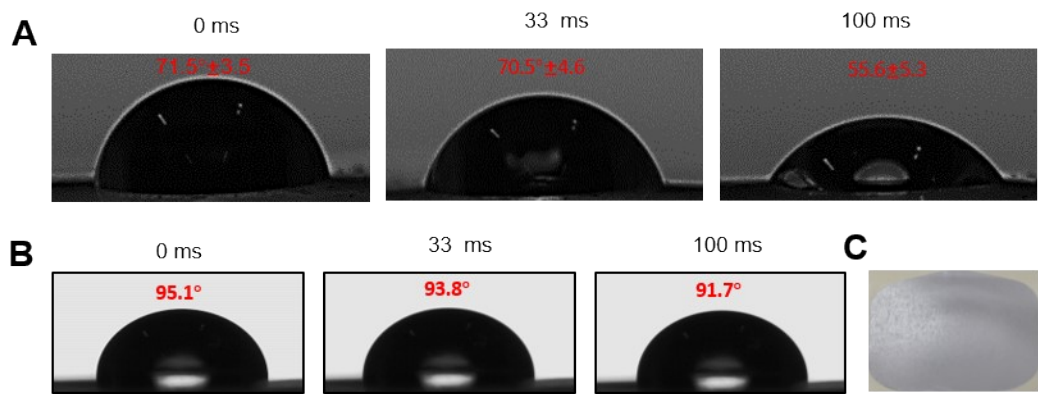

**Fig. S8.** Contact angel for water of the RSF film and 3M Transparent Dressing.

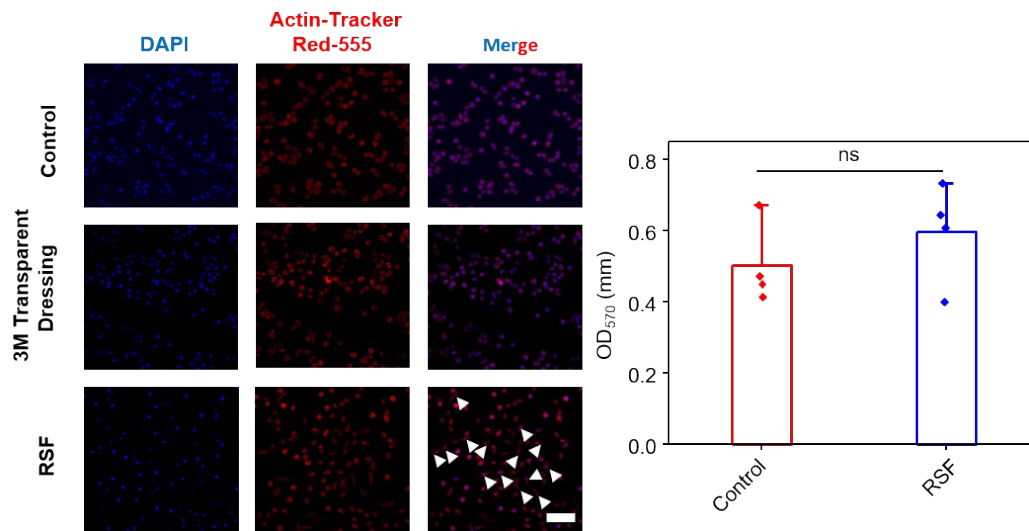

**Fig. S9.** Cell adhesion assay of 3M Transparent Dressing and the RSF film. Scale bar = 200  $\mu$ m.

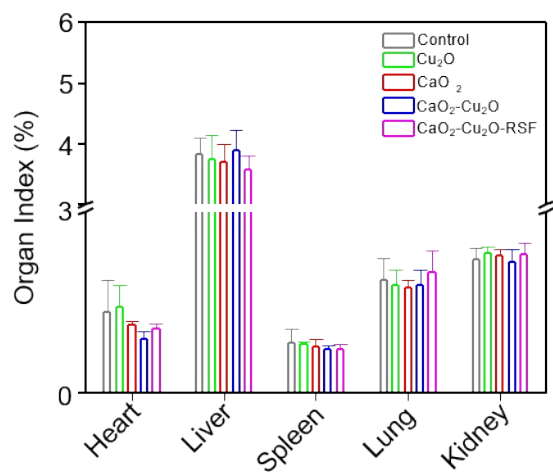

**Fig. S10.** Organ indexes of different experimental groups.

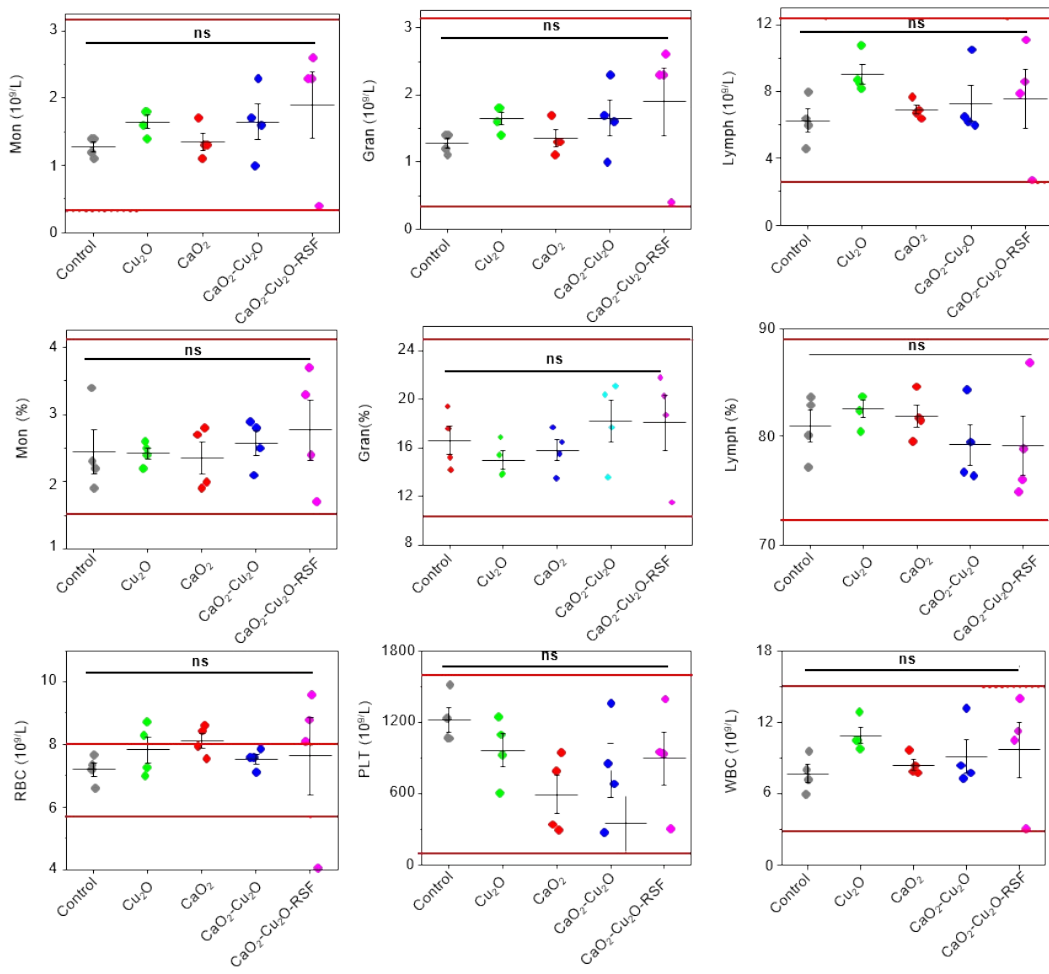

**F**

**ig. S11.** Blood routine index of different groups.

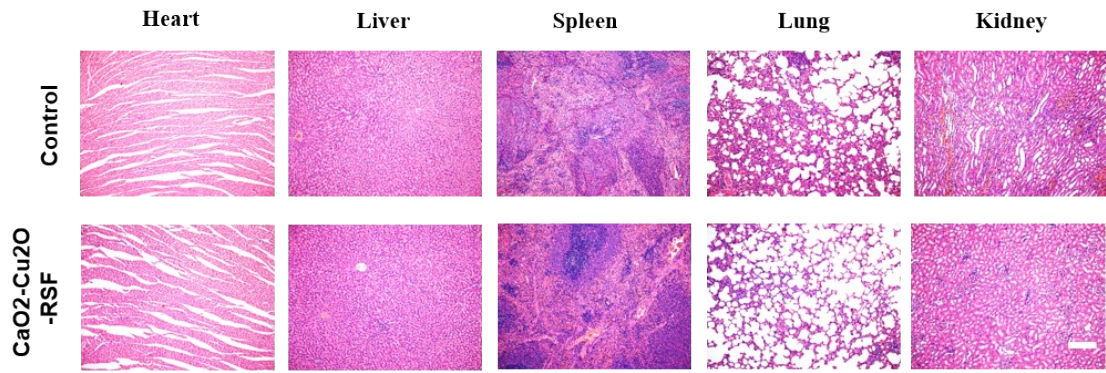

**Fig. S12.** H&E staining of major organs (heart, liver, spleen, lungs and kidneys) of rats on day 14 in wound healing experiments. Scale bars = 200  $\mu\text{m}$ .
